# Supplementary material
Source: PubMed Central journal article supplement (PMC4487557)
Supplement: NIHMS63838-supplement-01.pdf [file NIHMS63838-supplement-01.pdf]

Neuron, volume 57

**Supplemental Data**

**Ivy Cells: A Population of Nitric-Oxide-Producing, Slow-Spiking  
GABAergic Neurons and Their Involvement in Hippocampal  
Network Activity**

**Pablo Fuentealba, Rahima Begum, Marco Capogna, Shozo Jinno, László F. Márton,  
Jozsef Csicsvari, Alex Thomson, Peter Somogyi, and Thomas Klausberger**

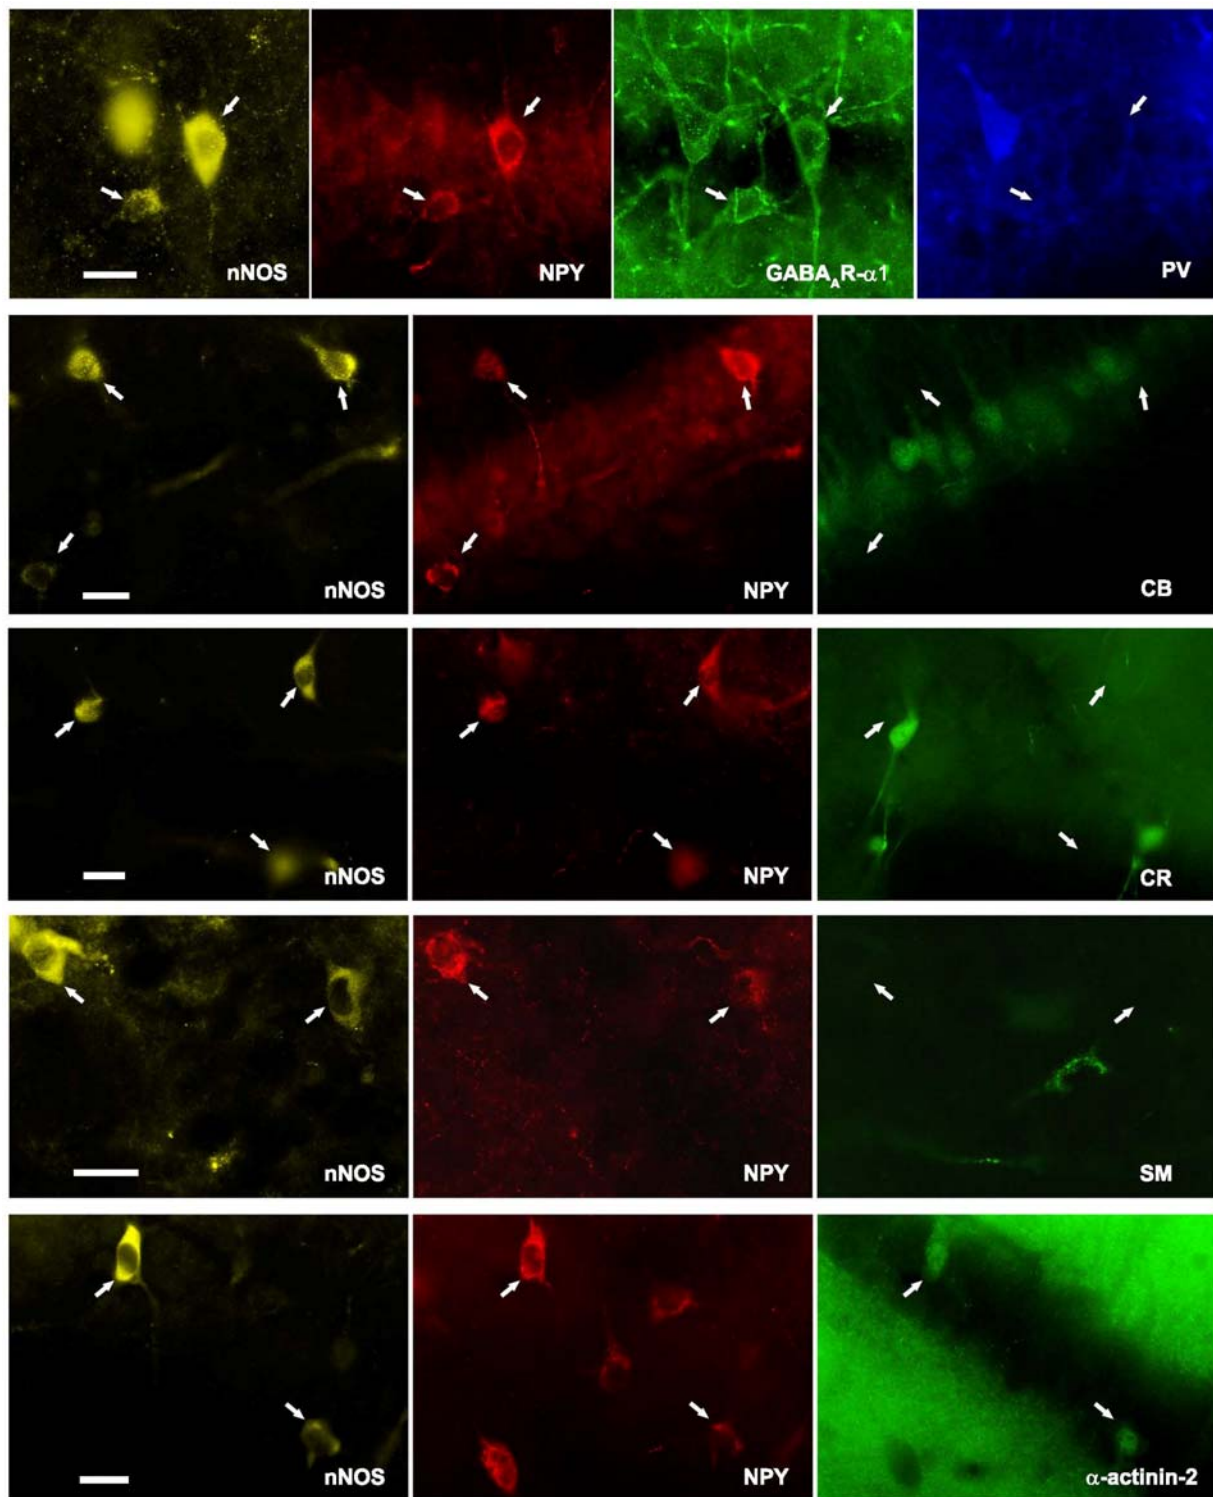

**Figure S1.** Molecular expression profile of putative Ivy cells. Fluorescent micrographs show putative Ivy cells (arrows) in and around stratum pyramidale identified by the co-localization of nNOS, NPY and in the top panel the  $\alpha 1$  subunit of the GABA<sub>A</sub> receptor. Putative Ivy cells are immunonegative for the Ca<sup>2+</sup>-binding proteins PV, CB, CR, or the neuropeptide somatostatin (SM). On the other hand, a large fraction of putative Ivy cells showed somatic labeling for  $\alpha$ -actinin-2. Scale bars 20  $\mu$ m.

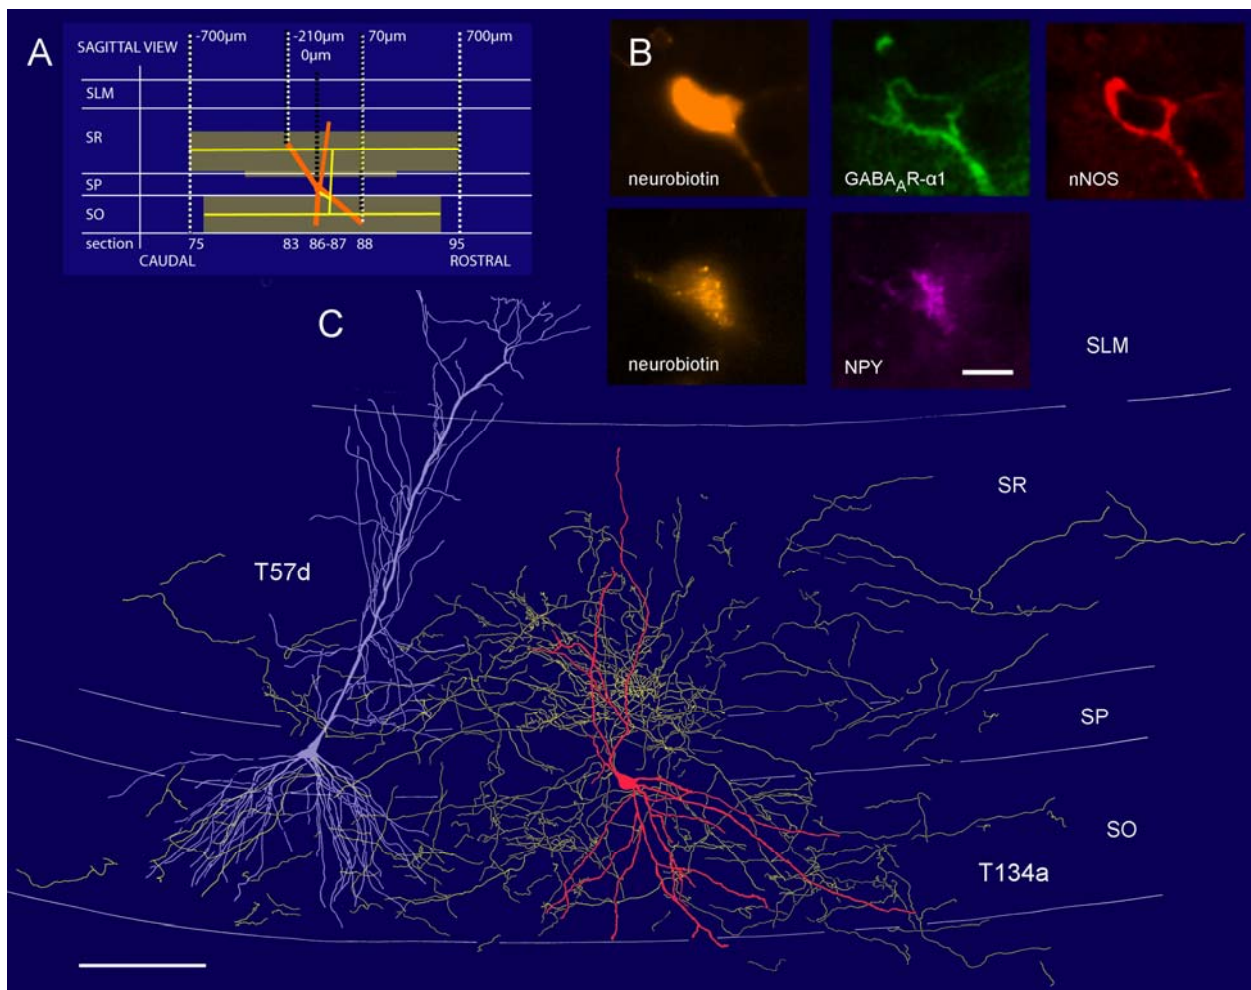

**Figure S2.** An Ivy cell with a large axonal field spanning three layers recorded *in vivo*. (A) Schematic sagittal view and rostro-caudal extent of the axonal and dendritic arborizations of cell T134a. (B) Fluorescence micrographs of the soma cut in half during sectioning. The recorded cell is immunopositive for nNOS and GABA<sub>A</sub>R-α1 in one half of the soma, and NPY in the other half. For examples of the firing patterns of this cell, see Supplementary Figure 3. (C) Reconstruction of the soma and dendrites (orange) are shown from three sections, the axon (yellow) is shown only from four 70-μm-thick sections for clarity. Note the very dense axon in both stratum oriens and proximal radiatum. A pyramidal cell (blue, T57d) recorded and labeled in another animal, is added for illustrating spatial relationships. Scale bars: (B) 10 μm; (C) 100 μm.

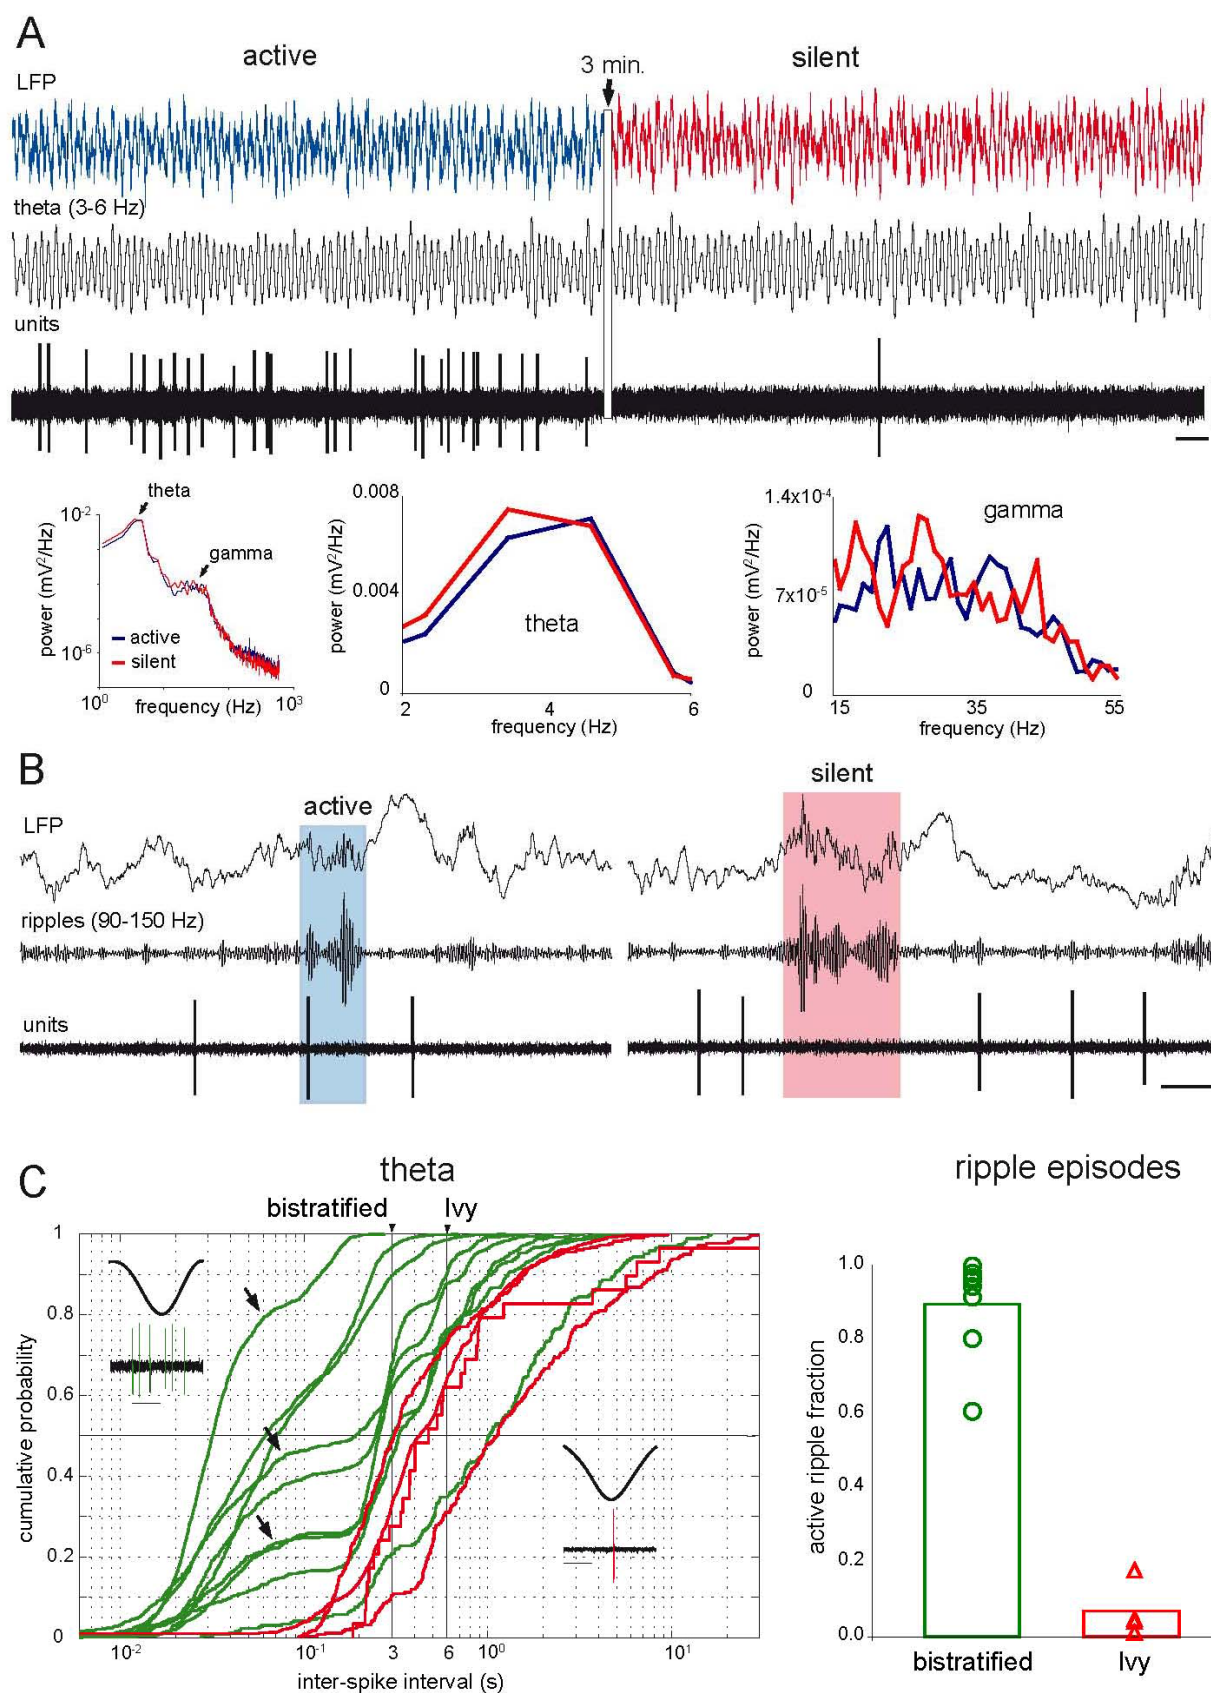

**Figure S3.** Variability in the firing patterns of Ivy cells during network oscillations and comparison with bistratified cells. (A) Transitions from engagement into firing at almost every

oscillatory cycle to long, silent epochs ( $> 20$  s) could take place within the same period of sustained theta oscillations. Left, examples of the local field potential (LFP, 0.3-300 Hz), LFP filtered for theta oscillations (3-6 Hz) and the single unit activity (units, 0.8-5 kHz) from an identified Ivy cell (T134a). The cell discharges (mean = 1.35 Hz) in some consecutive theta cycles, rarely more than one spike per cycle. Right, from the same theta period as left, but three minutes later; the cell fired at a low rate (0.05 Hz), even though the theta and gamma power, and general power distribution have not changed (bottom panels). (B) Examples of firing activity of another identified Ivy cell (T98e) around ripple oscillations. Note the cell discharging during one of the ripple episodes (left), whereas it remained silent in the next (right). (C) Left, cumulative probability function for the inter-spike intervals from identified Ivy (red) and bistratified (green) cells during theta oscillations. Solid vertical lines indicate average median values. Ivy cells discharged at significantly longer intervals than bistratified cells ( $0.6 \pm 0.2$  vs.  $0.3 \pm 0.1$  s, respectively;  $P = 0.034$ ), and also fired at significantly lower frequencies ( $P = 0.024$ ), and also with lower probability ( $P = 0.016$ ) than bistratified cells throughout theta oscillations ( $0.7 \pm 0.4$  vs.  $5.4 \pm 2.4$  Hz, and  $0.025 \pm 0.010$  vs.  $0.133 \pm 0.150$ , respectively). The mean phase preference of Ivy cells ( $30.7 \pm 63.1^\circ$ ) was significantly different ( $P = 0.02$ , two-sample exact permutation test) from that of bistratified cells ( $1 \pm 60^\circ$ ). Bumps in the interspike interval distributions of most bistratified cells (arrows) result from high frequency activity ( $> 10$  Hz) during individual theta cycles, which do not occur for Ivy cells. Insets, bistratified cells usually fire multiple action potentials during one theta cycle (green spikes), but Ivy cells rarely discharge more than one spike (red). Right, fraction of ripple episodes, during which Ivy (red) and bistratified (green) cells were active (discharged at least one action potential). Both discharge frequency and probability were significantly lower in Ivy than in bistratified cells ( $P = 0.006$  and  $P = 0.004$ , respectively) during ripple oscillations. Symbols represent individual cells and rectangles indicate averages. Vertical scale bars (A) LFP, theta, and units 0.5 mV; (B) LFP 1 mV, ripples 0.2 mV, units 0.5 mV. Horizontal scale bars (A) 1 s; (B) 200 ms; (C) 100 ms.

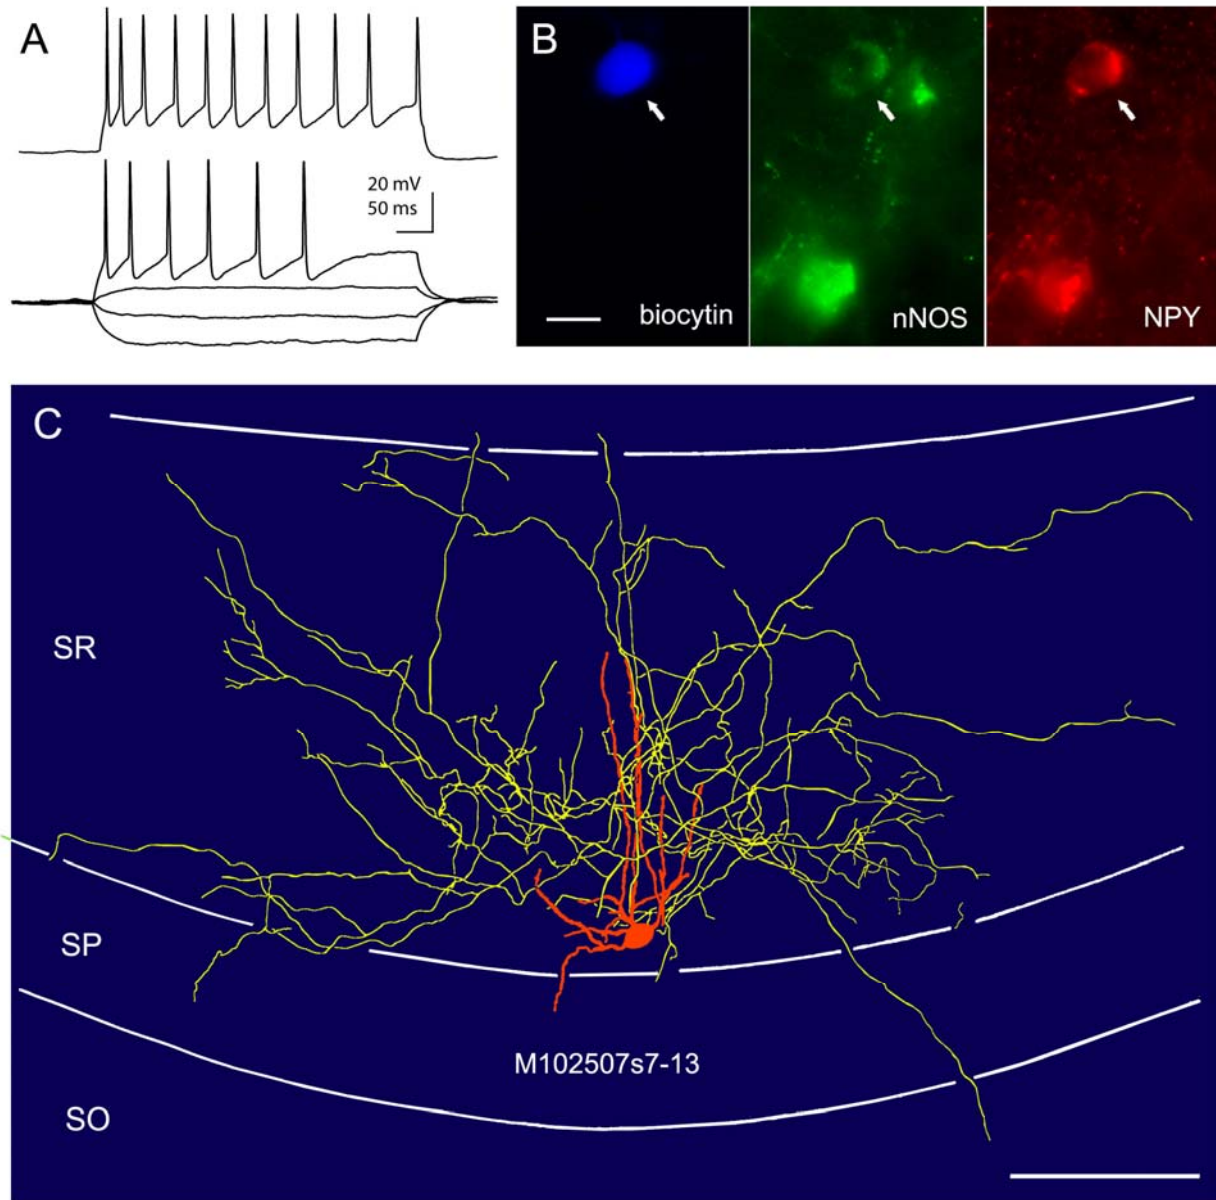

**Figure S4.** Axonal and dendritic distribution, molecular expression profile and *in vitro* spike trains of an Ivy cell recorded and labeled in stratum radiatum. (A) Voltage responses elicited by current pulses (-60, -20, +20, +80, +120 pA) injected to an Ivy cell (M102507s7-13). (B) Immunofluorescence micrographs of the recorded Ivy cell demonstrating that the cell was immunopositive for nNOS and NPY (soma, left). Note a second nNOS/NPY immunopositive neuron (bottom) that was not recorded. (C) Reconstruction of the soma, dendrites (red) and axonal processes (yellow) of the recorded Ivy cell from two 70  $\mu\text{m}$  thick sections. SR, stratum radiatum; SP, stratum pyramidale; SO, stratum oriens. Scale bars: (B), 10  $\mu\text{m}$ ; (C), 100  $\mu\text{m}$ .

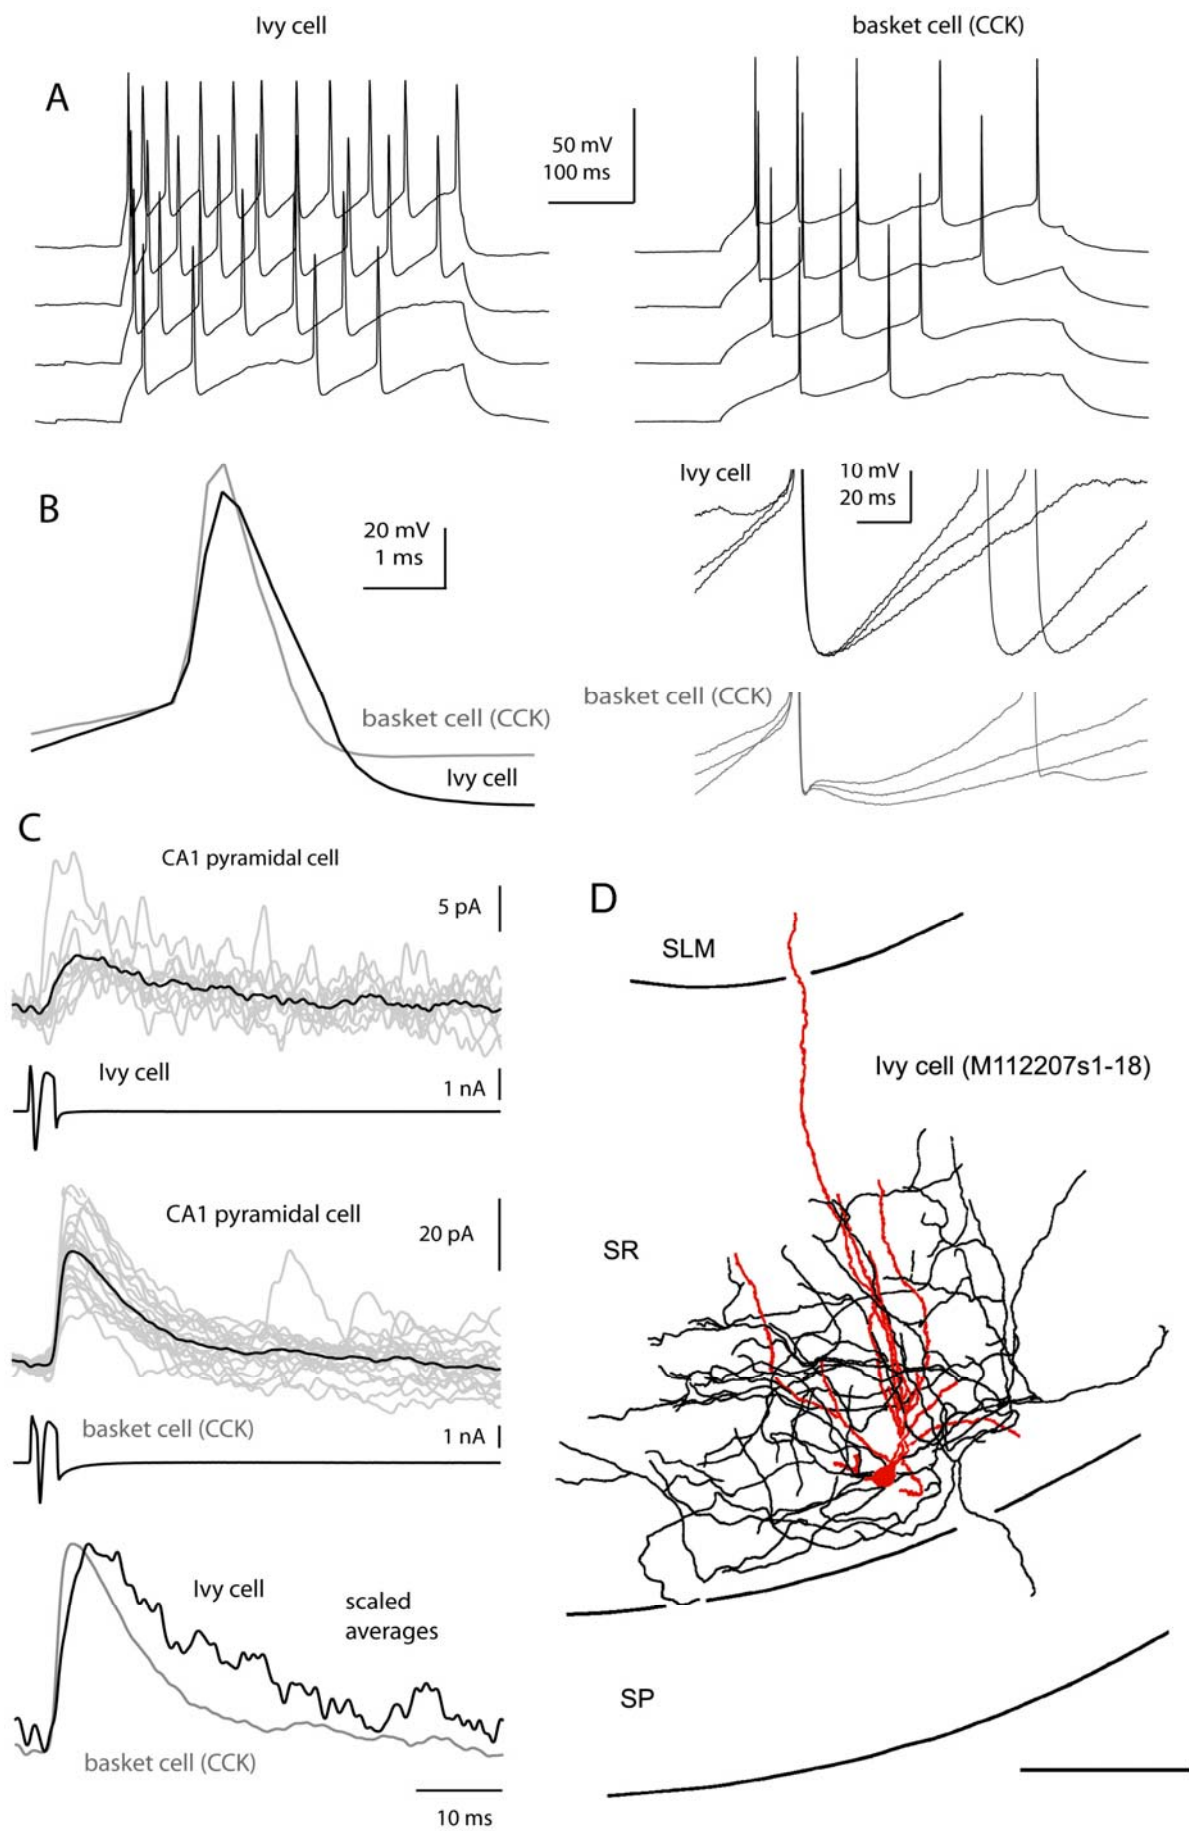

**Figure S5.** Ivy and CCK-expressing basket cells in stratum radiatum have different spike shape and evoke distinct postsynaptic responses. (A) Action potentials (APs) elicited by rectangular depolarising current pulses (90-180 pA) in an Ivy cell (*left*, M102507s7-13) and a CCK-expressing basket cell (*right*, M102407s13-18). Note the pronounced afterhyperpolarisations (AHP) and broad APs in the Ivy cell. (B) *Left*, representative APs evoked in the same Ivy and CCK-expressing basket cell in response to short depolarising current pulses (800 pA, 3 ms) are shown superimposed and aligned on the rising phase. Note that the AP of the Ivy cell is broader than the AP in the CCK-positive basket cell. *Right*, Action potentials (truncated) followed by the AHP in the two cell types. In the Ivy cell (M112207s1-18) the AHP had larger amplitude and shorter duration than in the CCK expressing-basket cell (M102407s13-18). Note that Ivy cells exhibited a single-component, medium-duration AHP, whereas CCK-basket cells displayed a two-component AHP, i.e. a fast initial AHP, followed by a slow component. (C) Unitary inhibitory synaptic currents (uIPSCs) (*upper traces*; *black traces*: average; *grey traces*: single sweeps) evoked in two different CA1 pyramidal cells by action currents elicited in an Ivy cell (M112207s22-30) (*middle left trace*) or a CCK-positive basket cell (M111307s4-10) (*middle right trace*). Bottom, the average uIPSCs elicited by the Ivy cell (*black*) and by the CCK expressing-basket cell (*grey trace*) are shown superimposed after scaling. Note that in these recordings, the uIPSC mediated by the Ivy cell was considerably smaller and slower than the one evoked by the CCK positive-basket cell. (D) Reconstruction of the soma, dendrites (red) and axonal processes (yellow) of the recorded Ivy cell (M112207s22-30) from two 70  $\mu\text{m}$  thick sections. SR, stratum radiatum; SP, stratum pyramidale; SO, stratum oriens. Scale bar 100  $\mu\text{m}$ .



**Table S1.** Proportions of PV and/or NPY and/or nNOS expressing cells determined by the disector method in confocal microscopy

| markers               | number of cells <sup>1</sup> |            |            |           |            | cell densities <sup>2</sup> (10 <sup>3</sup> /mm <sup>3</sup> ) |             |             |             |             |
|-----------------------|------------------------------|------------|------------|-----------|------------|-----------------------------------------------------------------|-------------|-------------|-------------|-------------|
|                       | SO                           | SP         | SR         | SLM       | total      | SO                                                              | SP          | SR          | SLM         | total       |
| <b>PV+/NPY+/nNOS-</b> | 28                           | 110        | 3          | 0         | 141        | 0.32 ± 0.10                                                     | 2.28 ± 0.25 | 0.01 ± 0.01 | 0           | 0.34 ± 0.05 |
| <b>PV-/NPY+/nNOS+</b> | 42                           | 182        | 112        | 14        | 350        | 0.48 ± 0.22                                                     | 3.80 ± 0.54 | 0.58 ± 0.18 | 0.16 ± 0.01 | 0.84 ± 0.07 |
| <b>PV+/NPY-/nNOS-</b> | 96                           | 145        | 5          | 0         | 246        | 1.10 ± 0.17                                                     | 3.02 ± 0.22 | 0.02 ± 0.03 | 0           | 0.59 ± 0.02 |
| <b>PV-/NPY+/nNOS-</b> | 51                           | 44         | 11         | 20        | 126        | 0.58 ± 0.19                                                     | 0.91 ± 0.29 | 0.05 ± 0.04 | 0.24 ± 0.09 | 0.30 ± 0.10 |
| <b>PV-/NPY-/nNOS+</b> | 7                            | 20         | 45         | 18        | 90         | 0.08 ± 0.02                                                     | 0.42 ± 0.23 | 0.23 ± 0.03 | 0.21 ± 0.08 | 0.22 ± 0.04 |
| <b>PV+/NPY-/nNOS+</b> | 0                            | 0          | 0          | 0         | 0          | 0                                                               | 0           | 0           | 0           | 0           |
| <b>PV+/nNOS+/NPY+</b> | 0                            | 0          | 0          | 0         | 0          | 0                                                               | 0           | 0           | 0           | 0           |
| <b>total</b>          | <b>224</b>                   | <b>501</b> | <b>176</b> | <b>52</b> | <b>953</b> |                                                                 |             |             |             |             |

<sup>1</sup> Values represent the numbers of randomly sampled cells according to the optical disector principle (3 animals, 3 sections from each).

<sup>2</sup> Values represent the means ± SD of numerical densities of three animals.

SO, stratum oriens; SP, stratum pyramidale; SR, stratum radiatum; SLM, stratum lacunosum-moleculare

**Table S2.** Proportions of nNOS and NPY co-expressing cells immunopositive for PV, GABA<sub>A</sub>R- $\alpha$ 1 (countings in all layers);  $\alpha$ -actinin-2, calretinin (CR), calbindin (CB) or somatostatin (SM) (countings in stratum pyramidale only) determined by quadruple or triple epi-immunofluorescence-microscopy. Mean  $\pm$  SD from 3 animals, 1 section from each. Antibodies to NPY were raised in rabbit (CR table, SM table) or sheep (GABA<sub>A</sub>- $\alpha$ 1 table, CB table,  $\alpha$ -actinin-2 table) and those to nNOS in mouse (GABA<sub>A</sub>- $\alpha$ 1 table, CR table, CB table) or sheep (SM table) or rabbit ( $\alpha$ -actinin-2 table).

| Molecular markers                                 | percentages of PV and/or nNOS and/or NPY and/or GABA <sub>A</sub> - $\alpha$ 1 immunopositive cells |                 |                 |                  |                 |
|---------------------------------------------------|-----------------------------------------------------------------------------------------------------|-----------------|-----------------|------------------|-----------------|
|                                                   | SO                                                                                                  | SP              | SR              | SLM              | total           |
| PV+/nNOS-/NPY-/ GABA <sub>A</sub> R- $\alpha$ 1-  | 0%                                                                                                  | 1.4 $\pm$ 2.4%  | 0%              | 0%               | 1.0 $\pm$ 1.7%  |
| PV-/nNOS+/NPY-/ GABA <sub>A</sub> R - $\alpha$ 1- | 0%                                                                                                  | 2.5 $\pm$ 0.4%  | 0%              | 0%               | 1.8 $\pm$ 0.3%  |
| PV-/nNOS-/NPY-/ GABA <sub>A</sub> R - $\alpha$ 1+ | 8.3 $\pm$ 14.4%                                                                                     | 1.9 $\pm$ 1.3%  | 7.7 $\pm$ 4.9%  | 32.4 $\pm$ 29.3% | 4.5 $\pm$ 2.6%  |
| PV-/nNOS-/NPY+/ GABA <sub>A</sub> R - $\alpha$ 1- | 0%                                                                                                  | 0%              | 0%              | 0%               | 0%              |
| PV+/nNOS-/NPY-/ GABA <sub>A</sub> R - $\alpha$ 1+ | 8.3 $\pm$ 14.4%                                                                                     | 21.5 $\pm$ 5.6% | 0%              | 0%               | 16.4 $\pm$ 3.9% |
| PV+/nNOS+/NPY-/ GABA <sub>A</sub> R - $\alpha$ 1- | 0%                                                                                                  | 0%              | 0%              | 0%               | 0%              |
| PV+/nNOS-/NPY+/ GABA <sub>A</sub> R - $\alpha$ 1- | 4.2 $\pm$ 7.2%                                                                                      | 0%              | 0%              | 0%               | 0.3 $\pm$ 0.4%  |
| PV-/nNOS+/NPY-/ GABA <sub>A</sub> R - $\alpha$ 1+ | 3.3 $\pm$ 5.8%                                                                                      | 5.0 $\pm$ 6.6%  | 1.9 $\pm$ 3.2%  | 38.9 $\pm$ 24.1% | 6.4 $\pm$ 4.4%  |
| PV-/nNOS-/NPY+/ GABA <sub>A</sub> R - $\alpha$ 1+ | 0%                                                                                                  | 3.8 $\pm$ 0.7%  | 0%              | 4.2 $\pm$ 7.2%   | 3.1 $\pm$ 0.1%  |
| PV-/nNOS+/NPY+/ GABA <sub>A</sub> R - $\alpha$ 1- | 0%                                                                                                  | 0%              | 0%              | 0%               | 0%              |
| PV+/nNOS+/NPY-/ GABA <sub>A</sub> R - $\alpha$ 1+ | 0%                                                                                                  | 0%              | 0%              | 0%               | 0%              |
| PV+/nNOS-/NPY+/ GABA <sub>A</sub> R - $\alpha$ 1+ | 0%                                                                                                  | 13.7 $\pm$ 7.7% | 5.9 $\pm$ 5.6%  | 0%               | 11.0 $\pm$ 6.2% |
| PV+/nNOS+/NPY+/ GABA <sub>A</sub> R - $\alpha$ 1- | 0%                                                                                                  | 0.3 $\pm$ 0.5%  | 0%              | 0%               | 0.2 $\pm$ 0.4%  |
| PV-/nNOS+/NPY+/ GABA <sub>A</sub> R - $\alpha$ 1+ | 75.8 $\pm$ 22.4%                                                                                    | 49.4 $\pm$ 2.9% | 84.5 $\pm$ 9.7% | 24.5 $\pm$ 4.3%  | 54.9 $\pm$ 1.7% |
| PV+/nNOS+/NPY+/ GABA <sub>A</sub> R - $\alpha$ 1+ | 0%                                                                                                  | 0.6 $\pm$ 0.5%  | 0%              | 0%               | 0.5 $\pm$ 0.4%  |
| total number of cells                             | 22                                                                                                  | 288             | 56              | 20               | 386             |

| Molecular markers                 | percentage      |
|-----------------------------------|-----------------|
| nNOS-/NPY-/ $\alpha$ -actinin-2+  | 3.3 $\pm$ 2.9%  |
| nNOS- /NPY+/ $\alpha$ -actinin-2- | 9.2 $\pm$ 2.3%  |
| nNOS+/NPY-/ $\alpha$ -actinin-2-  | 13.0 $\pm$ 8.1% |
| nNOS-/NPY+/ $\alpha$ -actinin-2+  | 1.1 $\pm$ 0.9%  |
| nNOS+/NPY-/ $\alpha$ -actinin-2+  | 0.5 $\pm$ 0.9%  |
| nNOS+/NPY+/ $\alpha$ -actinin-2-  | 18.5 $\pm$ 7.1% |
| nNOS+/NPY+/ $\alpha$ -actinin-2+  | 54.3 $\pm$ 6.8% |
| total number of cells             | 184             |

| Molecular markers     | percentage      |
|-----------------------|-----------------|
| nNOS-/NPY-/CB+        | 2.5 $\pm$ 2.4%  |
| nNOS-/NPY+/CB-        | 16.2 $\pm$ 6.0% |
| nNOS+/NPY-/CB-        | 7.2 $\pm$ 4.2%  |
| nNOS-/NPY+/CB+        | 1.0 $\pm$ 1.8%  |
| nNOS+/NPY-/CB+        | 0%              |
| nNOS+/NPY+/CB-        | 72.6 $\pm$ 3.1% |
| nNOS+/NPY+/CB+        | 0.5 $\pm$ 0.9%  |
| total number of cells | 202             |

| Molecular markers     | percentage      |
|-----------------------|-----------------|
| nNOS-/NPY-/CR+        | 8.3 $\pm$ 4.3%  |
| nNOS-/NPY+/CR-        | 5.7 $\pm$ 3.0%  |
| nNOS+/NPY-/CR-        | 4.1 $\pm$ 2.4%  |
| nNOS-/NPY+/CR+        | 0%              |
| nNOS+/NPY-/CR+        | 2.0 $\pm$ 2.2%  |
| nNOS+/NPY+/CR-        | 77.2 $\pm$ 6.4% |
| nNOS+/NPY+/CR+        | 2.6 $\pm$ 2.3%  |
| total number of cells | 154             |

| Molecular markers     | percentage      |
|-----------------------|-----------------|
| nNOS-/NPY-/SM+        | 19.5 $\pm$ 4.3% |
| nNOS-/NPY+/SM-        | 3.7 $\pm$ 5.1%  |
| nNOS+/NPY-/SM-        | 6.0 $\pm$ 2.7%  |
| nNOS-/NPY+/SM+        | 10.5 $\pm$ 4.9% |
| nNOS+/NPY-/SM+        | 2.6 $\pm$ 0.5%  |
| nNOS+/NPY+/SM-        | 57.3 $\pm$ 5.3% |
| nNOS+/NPY+/SM+        | 0.4 $\pm$ 0.7%  |
| total number of cells | 240             |

**Table S3.** Discharge frequencies and preferred firing phase of Ivy cells during theta and gamma oscillations

| cell  | discharge rate (Hz) |         |       | mean phase (°) ± angular deviation |          | duration (s) or number ( <i>n</i> ) of oscillatory episodes |           |                      |           |
|-------|---------------------|---------|-------|------------------------------------|----------|-------------------------------------------------------------|-----------|----------------------|-----------|
|       | theta               | ripples | nt/nr | theta                              | gamma    | theta (s)                                                   | gamma (s) | ripples ( <i>n</i> ) | nt/nr (s) |
| P2a   | 0.1                 | 0.3     | 1.8   | 15 ± 71                            | 9 ± 67   | 234                                                         | 865       | 36                   | 575       |
| T98e  | 0.6                 | 0.4     | 1.9   | 55 ± 58                            | 20 ± 69  | 240                                                         | 203       | 110                  | 142       |
| T134a | 0.3                 | 2.4     |       | 0 ± 54                             | 52 ± 72  | 1092                                                        | 1124      | 24                   |           |
| T140b | 1.8                 | 0       | 1.4   | 53 ± 70                            | 318 ± 64 | 854                                                         | 319       | 30                   | 60        |

nt/nr, non-theta/non-ripple periods; 0° marks trough of oscillation cycles.

**Table S4.** List of primary antibodies

| antibody                               | species    | dilution        | source                                                            | specificity reference                                                                                       |
|----------------------------------------|------------|-----------------|-------------------------------------------------------------------|-------------------------------------------------------------------------------------------------------------|
| $\alpha$ -actinin-2                    | mouse      | 1:1000          | Sigma, code A7811                                                 | Fridlianskaia et al., 1989                                                                                  |
|                                        | rabbit     | 1:1000          | Dr. A. Beggs, Children's Hospital, Boston, MA, USA, code 4A3      | Chan et al., 1998                                                                                           |
| Calbindin                              | rabbit     | 1:5000          | Swant, code CB-38                                                 | Raised to rat recombinant calbindin. Labeling pattern as published with other antibodies.                   |
|                                        | mouse      | 1:400           | Swant, code 300                                                   | Celio et al., 1990                                                                                          |
| CCK                                    | rabbit     | 1:500           | Pro-CCK; Dr. A. Varro, Liverpool University, code L424            | Morino et al., 1994                                                                                         |
|                                        | mouse      | 1:10000         | Dr. G. Ohning, CURE, UCLA, USA, code 9303                         | Ohning et al., 1996                                                                                         |
| Calretinin                             | goat       | 1:1000          | Swant, code CG1                                                   | Raised to human recombinant CR. Labeling pattern as published with other antibodies.                        |
| GABA <sub>A</sub> R $\alpha$ 1 subunit | rabbit     | 0.4 $\mu$ g/ml  | Dr. W. Sieghart, Brain Res. Inst., Vienna, Austria                | ZeZula et al., 1991; Baude et al., 2006, KO test.                                                           |
| GAD                                    | sheep      | 1:500           | Dr. E. Mugnaini, Northwestern Univ., Chicago, USA, code GAD1440-4 | Oertel et al., 1980                                                                                         |
| Kv3.1b                                 | rabbit     | 0.6 $\mu$ g/ml  | Alomone Labs. code APC-014                                        | Raised to residues 567-585 of rat sequence. Western blot, Gelband et al., 1999                              |
| M2 receptor                            | rat        | 1.4 $\mu$ g/ml  | Chemicon, code MAB367                                             | Levey et al., 1995                                                                                          |
| mGluR1 $\alpha$                        | guinea pig | 0.5 $\mu$ g/ml  | Dr. M. Watanabe, Hokkaido University, Japan                       | Nakamura et al., 2004                                                                                       |
| mGluR8a                                | guinea pig | 1.1 $\mu$ g/ml  | Dr. R. Shigemoto, Natl. Institute Physiol., Okazaki, Japan        | Shigemoto et al., 1996                                                                                      |
| $\mu$ opioid receptor                  | guinea pig | 1:1000          | Chemicon, code AB1774                                             | Raised to residues 384-398 of rat receptor. Labeling pattern as published with other antibodies.            |
| nNOS                                   | rabbit     | 1:1000          | Chemicon, code AB5380                                             | Raised to recombinant human nNOS. Labeling pattern as published with other antibodies.                      |
|                                        | mouse      | 1:1000          | Sigma, code N2280                                                 | Raised to recombinant rat nNOS residues 1-181. Labeling pattern as published with other antibodies.         |
|                                        | sheep      | 1:500           | Chemicon, code AB1529                                             | Raised to residues 1409-1429 of rat NOS. Labeling pattern as published with other antibodies.               |
| NPY                                    | rabbit     | 1:5000          | DiaSorin, code 22940                                              | Labeling pattern as published with other antibodies. Absorption tested by manufacturer to 6 other peptides. |
|                                        | sheep      | 1:1000          | Chemicon, code AB1583                                             | Blessing et al., 1986                                                                                       |
| PPTA                                   | guinea pig | 0.85 $\mu$ g/ml | Dr. T. Kaneko, Kyoto University, Japan                            | Kaneko et al., 1998                                                                                         |
| PPTB                                   | guinea pig | 0.8 $\mu$ g/ml  | Dr. T. Kaneko, Kyoto University, Japan                            | Kaneko et al., 1998.                                                                                        |
| Parvalbumin                            | guinea pig | 1:1000          | Dr. K.G. Baimbridge, code GP404                                   | Raised to purified rat muscle parvalbumin. Labeling pattern                                                 |

|              |        |        |                                                       |                                                                            |
|--------------|--------|--------|-------------------------------------------------------|----------------------------------------------------------------------------|
|              |        |        |                                                       | as published with other antibodies, and K.G.B. personal communication.     |
| Somatostatin | mouse  | 1:500  | Dr. A. Buchan, Univ. Br. Columbia, Canada, code Soma8 | Vincent et al., 1985.                                                      |
| VIP          | rabbit | 1:2000 | Euro-Diagnostica, UK, Code B34-1                      | Raised to porcine VIP. Labeling pattern as published with other antibodies |
|              | mouse  | 1:5000 | Biogenesis, Code 9535-0504                            | Dey et al., 1988.                                                          |

## REFERENCES

- Baude A, Bleasdale C, Dalezios Y, Somogyi P, Klausberger T (2006) Immunoreactivity for the GABAA Receptor  $\alpha 1$  Subunit, Somatostatin and Connexin36 Distinguishes Axoaxonic, Basket, and Bistratified Interneurons of the Rat Hippocampus. *Cereb Cortex*.
- Blessing WW, Howe PR, Joh TH, Oliver JR, Willoughby JO (1986) Distribution of tyrosine hydroxylase and neuropeptide Y-like immunoreactive neurons in rabbit medulla oblongata, with attention to colocalization studies, presumptive adrenaline-synthesizing perikarya, and vagal preganglionic cells. *J Comp Neurol* 248:285-300.
- Celio MR, Baier W, Scharer L, Gregersen HJ, de Viragh PA, Norman AW (1990) Monoclonal antibodies directed against the calcium binding protein Calbindin D-28k. *Cell Calcium* 11:599-602.
- Chan Y, Tong HQ, Beggs AH, Kunkel LM (1998) Human skeletal muscle-specific alpha-actinin-2 and -3 isoforms form homodimers and heterodimers in vitro and in vivo. *Biochem Biophys Res Commun* 248:134-139.
- Dey RD, Hoffpauir J, Said SI (1988) Co-localization of vasoactive intestinal peptide- and substance P-containing nerves in cat bronchi. *Neuroscience* 24:275-281.
- Fridlianskaia, II, Goncharova EI, Borisov AB, Krylova TA, Pinaev GP (1989) [Monoclonal antibodies to the muscle isoform of alpha-actinin--a marker for the study of the differentiation of skeletal and cardiac muscles]. *Tsitologija* 31:1234-1237.
- Gelband CH, Warth JD, Mason HS, Zhu M, Moore JM, Kenyon JL, Horowitz B, Summers C (1999) Angiotensin II type 1 receptor-mediated inhibition of K<sup>+</sup> channel subunit kv2.2 in brain stem and hypothalamic neurons. *Circ Res* 84:352-359.
- Kaneko T, Murashima M, Lee T, Mizuno N (1998) Characterization of neocortical non-pyramidal neurons expressing preprotachykinins A and B: a double immunofluorescence study in the rat. *Neuroscience* 86:765-781.
- Levey MS, Brumwell CL, Dryer SE, Jacob MH (1995) Innervation and target tissue interactions differentially regulate acetylcholine receptor subunit mRNA levels in developing neurons in situ. *Neuron* 14:153-162.
- Nakamura M, Sato K, Fukaya M, Araishi K, Aiba A, Kano M, Watanabe M (2004) Signaling complex formation of phospholipase Cbeta4 with metabotropic glutamate receptor type 1alpha and 1,4,5-trisphosphate receptor at the perisynapse and endoplasmic reticulum in the mouse brain. *Eur J Neurosci* 20:2929-2944.
- Oertel WH, Schmechel DE, Daly JW, Tappaz ML, Kopin IJ (1980) Localization of glutamate decarboxylase on line-immunoelectrophoresis and two-dimensional electrophoresis by use of the radioactive suicide substrate [2-3H]-gamma-acetylenic GABA. *Life Sci* 27:2133-2141.
- Ohning GV, Wong HC, Lloyd KC, Walsh JH (1996) Gastrin mediates the gastric mucosal proliferative response to feeding. *Am J Physiol* 271:G470-476.
- Shigemoto R, Kulik A, Roberts JD, Ohishi H, Nusser Z, Kaneko T, Somogyi P (1996) Target-cell-specific concentration of a metabotropic glutamate receptor in the presynaptic active zone. *Nature* 381:523-525.
- Vincent SR, McIntosh CH, Buchan AM, Brown JC (1985) Central somatostatin systems revealed with monoclonal antibodies. *J Comp Neurol* 238:169-186.
- Zeuzula J, Sieghart W (1991) Isolation of type I and type II GABAA-benzodiazepine receptors by immunoaffinity chromatography. *FEBS Lett* 284:15-18.

**Table S5.** Comparison of action potentials, membrane properties, molecular expression of Ivy and CCK-basket cells and the properties of their synaptic connections with CA1 pyramidal cells recorded intracellularly in stratum radiatum *in vitro*

| interneuron type               | Action potential                           |                              |                        | intrinsic membrane properties  |                         |                                            | molecular markers |     |     |      |
|--------------------------------|--------------------------------------------|------------------------------|------------------------|--------------------------------|-------------------------|--------------------------------------------|-------------------|-----|-----|------|
|                                | half width (ms)                            | AHP amplitude (mV)           | AHP half width (ms)    | Input resistance (M $\Omega$ ) | time constant (ms)      | resting potential (mV)                     | nNOS              | NPY | CCK | CB1R |
| <b>Ivy</b>                     |                                            |                              |                        |                                |                         |                                            |                   |     |     |      |
| m101907s7-s8                   | 1.1                                        | 20.2                         | 38.8                   | 399                            | 29.2                    | -69.7                                      | +                 | nt  | nt  | -    |
| m102507s10-s11                 | 1.3                                        | 19                           | 42.6                   | 468                            | 15.1                    | -67.5                                      | +                 | +   | -   | -    |
| m102507s2-s4                   | 0.9                                        | 14.6                         | 27                     | 443                            | 23.2                    | -61                                        | nt                | nt  | nt  | -    |
| m112207s1-s18                  | 1                                          | 20.6                         | 32.8                   | 357                            | 27.2                    | -63.7                                      | +                 | +   | nt  | -    |
| m112207s22-s32                 | 0.9                                        | 22.3                         | 26.6                   | 287                            | 19.7                    | -58.2                                      | +                 | +   | nt  | -    |
| mean $\pm$ SD                  | 1.0 $\pm$ 0.2*                             | 19.3 $\pm$ 2.9               | 33.6 $\pm$ 7.1*        | 390.8 $\pm$ 71.9               | 22.9 $\pm$ 5.7          | -64.0 $\pm$ 4.7                            |                   |     |     |      |
| <b>CCK-basket</b>              |                                            |                              |                        |                                |                         |                                            |                   |     |     |      |
| m101907s3-s4                   | 0.7                                        | 12.6                         | 51.7                   | 327                            | 47.6                    | -64.9                                      | -                 | nt  | +   | +    |
| m102407s1-s12                  | 0.8                                        | 6.7                          | 55.6                   | 315                            | 28.6                    | -66                                        | -                 | -   | +   | +    |
| m102407s15-s16                 | 0.8                                        | 17.1                         | 103.8                  | 699                            | 51.5                    | -60.8                                      | -                 | -   | +   | +    |
| m111307s4-s10                  | 0.6                                        | 14.7                         | 43.6                   | 489                            | 24.1                    | -61.1                                      | nt                | nt  | +   | +    |
| m111307s11-s34                 | 0.8                                        | 17.2                         | 42.1                   | 465                            | 51.9                    | -60.8                                      | nt                | nt  | +   | +    |
| mean $\pm$ SD                  | 0.7 $\pm$ 0.1                              | 13.7 $\pm$ 4.3               | 59.4 $\pm$ 25.5        | 459.0 $\pm$ 155.5              | 40.7 $\pm$ 13.3         | -62.7 $\pm$ 2.5                            |                   |     |     |      |
| <b>presynaptic interneuron</b> | <b>evoked IPSCs in CA1 pyramidal cells</b> |                              |                        |                                |                         |                                            |                   |     |     |      |
| <b>Ivy</b>                     | <b>amplitude (pA)</b>                      | <b>10-90% rise time (ms)</b> | <b>half width (ms)</b> | <b>decay time (ms)</b>         | <b>failure rate (%)</b> | <b>postsynaptic holding potential (mV)</b> |                   |     |     |      |
| m112207s22-s32                 | 9.9                                        | 3                            | 17.8                   | 13.6                           | 48                      | -50                                        |                   |     |     |      |
| m112207s1-s18                  | 6.1                                        | 2.6                          | 15.8                   | 18.5                           | 54                      | -50                                        |                   |     |     |      |
| <b>CCK-basket</b>              |                                            |                              |                        |                                |                         |                                            |                   |     |     |      |
| m111307s4-s10                  | 31.9                                       | 1.2                          | 8.3                    | 7.4                            | 58                      | -50                                        |                   |     |     |      |
| m111307s11-s34                 | 15.4                                       | 2.8                          | 10.4                   | 8.9                            | 50                      | -50                                        |                   |     |     |      |

AHP, afterhyperpolarization; \* indicates statistical significance at  $P < 0.05$ ; nt, not tested.
